# Supplementary material for: Effects of Dietary Yeast β-Glucan Supplementation on Meat Quality, Antioxidant Capacity and Gut Microbiota of Finishing Pigs
Source: MDPI journal article supplement (doi:10.3390/antiox11071340), 2022-07-08
Supplement: s1 [file s1]

## Supporting Information

### Supplementary Tables

Table S1. Primers used for qRT-PCR

Table S2. Effects of dietary yeast  $\beta$ -glucan supplementation on texture profile analysis of the longissimus thoracis muscle in finishing pigs (n = 8).

Table S3. Effects of dietary yeast  $\beta$ -glucan supplementation on fatty acid composition of the longissimus thoracis muscle in finishing pigs (% of fresh tissue, n = 8)

### Supplementary Figures

Figure S1. Effects of dietary yeast  $\beta$ -glucan supplementation on mRNA expression of genes concerning myosin heavy-chain (MyHC) isoform of the *M. longissimus thoracis* in finishing pigs.

Figure S2. Boxplots of alpha diversity as measured by diversity index of the colon microbiome.

**Table S1.** Primers used for qRT-PCR

| Gene            | Primer Sequence (5' to 3')                             | GeneBank No.   | TM (°C) |
|-----------------|--------------------------------------------------------|----------------|---------|
| <i>GAPDH</i>    | F: TCGGAGTGAACGGATTTG<br>R: CCTGGAAGATGGTGATGG         | NM_001206359.1 | 60      |
| <i>LDH</i>      | F: AGTCGTCTCAATCTGGTGCA<br>R: CACACGGTGCTTGGGTAATC     | NM_001113287.1 | 62      |
| <i>PGK1</i>     | F: CGCCACTGAATTGCCAAGAT<br>R: CATGACGACCCTCTTTCCT      | NM_001099932.2 | 58      |
| <i>MyHC I</i>   | F: CGTGGACTACAACATCATAGGC<br>R: CTTTGCCCTTCTCAACAGGT   | NM_213855      | 64      |
| <i>MyHC IIa</i> | F: GGAGATCGACGACCTTGCTA<br>R: CTCCTTGGATTTCAGCTCGC     | NM_214136      | 58      |
| <i>MyHC IIx</i> | F: GAAACCGTCAAGGGTCTACG<br>R: CGCTTCCTCAGCTTGTCTCT     | NM_001104951   | 64      |
| <i>MyHC IIb</i> | F: GTTCTGAAGAGGGTGGTAC<br>R: AGATGCGGATGCCCTCCA        | NM_001123141   | 63      |
| <i>SOD1</i>     | F: AGACCTGGGCAATGTGACTG<br>R: GTGCGGCCAATGATGGAATG     | NM_001190422   | 62      |
| <i>GPXI</i>     | F: GTGAATGGCGCAAATGCTCA<br>R: ATTGCGACACACTGGAGACC     | NM_214201      | 60      |
| <i>GST</i>      | F: CCAACCCAGAAGACTGCTCA<br>R: CATTCAGGTGGGCTCTTCGT     | AB000884       | 60      |
| <i>Keap1</i>    | F: ACGACGTGGAGACAGAAACGT<br>R: GCTTCGCCGATGCTTCA       | NM_001114671   | 62      |
| <i>NRF2</i>     | F: GCCCCTGGAAGCGTTAAAC<br>R: GGACTGTATCCCCAGAAGGTTGT   | XM_003133500   | 60      |
| <i>CAT</i>      | F: CAGATGAAGCATTGGAAGGAGC<br>R: TTGTCTCCTATCGGATTCCCAG | NM_214301      | 60      |
| <i>18sRNA</i>   | F: GAGCGAAAGCATTTGCCAAG<br>R: GGCATCGTTTATGGTCGGAAC    | NM_001244062   | 60      |

**Table S2.** Effects of dietary yeast  $\beta$ -glucan supplementation on texture profile analysis of the Longissimus Thoracis muscle in finishing pigs (n = 8)

| Items               | Yeast $\beta$ -glucan levels (mg/kg) |                    |                    |                     |                     | SEM  | P value |        |           |
|---------------------|--------------------------------------|--------------------|--------------------|---------------------|---------------------|------|---------|--------|-----------|
|                     | 0                                    | 50                 | 100                | 200                 | 400                 |      | ANOVA   | Linear | Quadratic |
| Hardness, N         | 39.34                                | 32.42              | 38.61              | 35.08               | 35.45               | 2.34 | 0.24    | 0.54   | 0.61      |
| Adhesiveness, mJ    | 0.07                                 | 0.08               | 0.09               | 0.08                | 0.07                | 0.01 | 0.57    | 0.75   | 0.19      |
| Cohesiveness, Ratio | 0.45                                 | 0.44               | 0.48               | 0.48                | 0.46                | 0.01 | 0.02    | 0.28   | 0.03      |
| Springiness, mm     | 2.99                                 | 3.04               | 3.09               | 3.07                | 2.99                | 0.08 | 0.82    | 0.82   | 0.27      |
| Gumminess, N        | 19.02 <sup>ab</sup>                  | 15.59 <sup>b</sup> | 22.70 <sup>a</sup> | 18.65 <sup>ab</sup> | 18.09 <sup>ab</sup> | 1.49 | 0.03    | 0.85   | 0.33      |
| Chewiness, mJ       | 50.89                                | 48.82              | 63.05              | 55.32               | 54.74               | 4.47 | 0.23    | 0.58   | 0.23      |

Note: Values with different superscripts means significant difference ( $p < 0.05$ ).

**Table S3.** Effects of dietary yeast  $\beta$ -glucan supplementation on fatty acid composition of the Longissimus Thoracis muscle in finishing pigs (% of Fresh Tissue, n = 8)

| Items             | Yeast $\beta$ -glucan levels (mg/kg) |       |       |       |       | SEM    | P value |        |           |
|-------------------|--------------------------------------|-------|-------|-------|-------|--------|---------|--------|-----------|
|                   | 0                                    | 50    | 100   | 200   | 400   |        | ANOVA   | Linear | Quadratic |
| C14:0             | 1.20                                 | 1.38  | 1.37  | 1.39  | 1.40  | 0.08   | 0.36    | 0.19   | 0.24      |
| C16:0             | 25.99                                | 26.23 | 26.53 | 26.29 | 26.76 | 0.29   | 0.41    | 0.10   | 0.86      |
| C16:1             | 3.23                                 | 3.25  | 3.02  | 3.22  | 3.41  | 0.12   | 0.26    | 0.16   | 0.20      |
| C17:0             | 0.17                                 | 0.20  | 0.19  | 0.18  | 0.18  | 0.01   | 0.54    | 0.83   | 0.53      |
| C18:0             | 14.19                                | 14.48 | 14.97 | 14.96 | 14.46 | 0.30   | 0.28    | 0.70   | 0.04      |
| C18:1n9c          | 41.97                                | 41.56 | 42.00 | 41.26 | 41.10 | 0.52   | 0.64    | 0.20   | 0.87      |
| C18:2n6c          | 8.43                                 | 8.79  | 8.00  | 8.47  | 8.47  | 0.55   | 0.90    | 0.99   | 0.80      |
| C18:3n3           | 0.31                                 | 0.31  | 0.31  | 0.30  | 0.32  | 0.01   | 0.93    | 0.72   | 0.65      |
| C20:0             | 0.27                                 | 0.30  | 0.28  | 0.28  | 0.30  | 0.01   | 0.41    | 0.37   | 0.85      |
| C20:1             | 0.75                                 | 0.77  | 0.72  | 0.75  | 0.73  | 0.03   | 0.88    | 0.66   | 0.83      |
| C21:0             | 0.35                                 | 0.38  | 0.36  | 0.37  | 0.37  | 0.02   | 0.75    | 0.52   | 0.84      |
| C20:3n6           | 0.20                                 | 0.23  | 0.18  | 0.21  | 0.24  | 0.02   | 0.28    | 0.23   | 0.50      |
| C20:4n6           | 1.39                                 | 1.61  | 1.25  | 1.55  | 1.70  | 0.17   | 0.39    | 0.21   | 0.67      |
| C20:3n3           | 0.04                                 | 0.06  | 0.05  | 0.06  | 0.07  | 0.01   | 0.42    | 0.13   | 0.79      |
| C24:0             | 0.04                                 | 0.05  | 0.04  | 0.05  | 0.05  | < 0.01 | 0.32    | 0.08   | 0.90      |
| SFA               | 42.74                                | 42.87 | 44.27 | 43.84 | 44.09 | 0.53   | 0.16    | 0.08   | 0.21      |
| MUFA              | 46.13                                | 45.69 | 44.54 | 45.35 | 45.42 | 0.62   | 0.49    | 0.64   | 0.25      |
| PUFA              | 10.58                                | 11.26 | 10.88 | 10.81 | 11.03 | 0.83   | 0.98    | 0.88   | 0.96      |
| n-3 PUFA          | 0.49                                 | 0.57  | 0.51  | 0.51  | 0.53  | 0.04   | 0.65    | 0.88   | 1.00      |
| n-6 PUFA          | 10.01                                | 10.63 | 9.44  | 10.23 | 10.40 | 0.72   | 0.81    | 0.75   | 0.75      |
| Total fatty acids | 82.41                                | 88.72 | 89.60 | 73.47 | 71.87 | 10.47  | 0.65    | 0.23   | 0.95      |

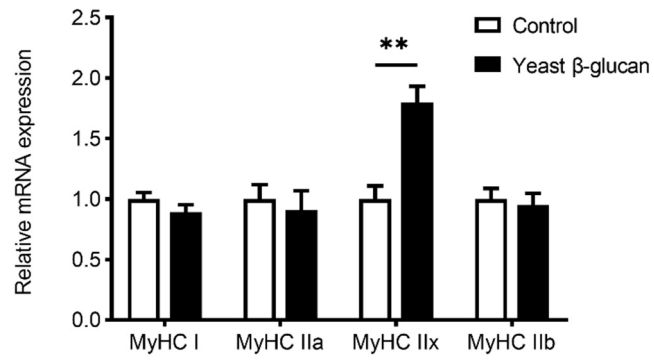

**Figure S1.** Effects of dietary yeast  $\beta$ -glucan supplementation on mRNA expression of genes concerning myosin heavy-chain (MyHC) isoform of the *M. longissimus thoracic* in finishing pigs. Yeast  $\beta$ -glucan, dietary supplementation of 200 mg/kg yeast  $\beta$ -glucan. Data are expressed as the means  $\pm$  SEMs ( $n = 8$ ). \*\* $p < 0.01$ .

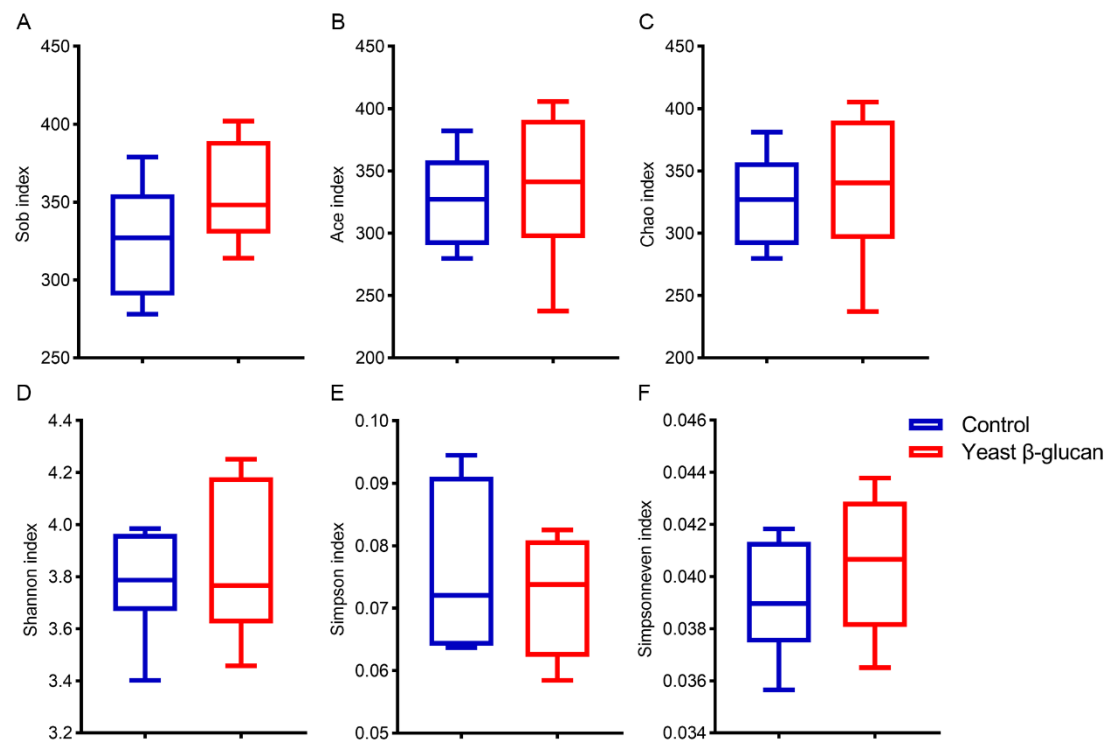

**Figure S2.** Boxplots of alpha diversity as measured by diversity index of the colon microbiome. Diversity index of (A) sob index, (B) Ace, (C) Chao, (D) Shannon, (E) Simpson and (F) Simpsonneven. Yeast  $\beta$ -glucan, dietary supplementation of 200 mg/kg yeast  $\beta$ -glucan. Alpha diversity indices were analyzed in Kruskal-Wallis to test for differences (n = 6).
